# Supplementary material
Source: Springer Nature journal article supplement (https://www.springermedizin.de/resource/supplementary/13102_2011_128_MOESM3_ESM.pdf/9667796)

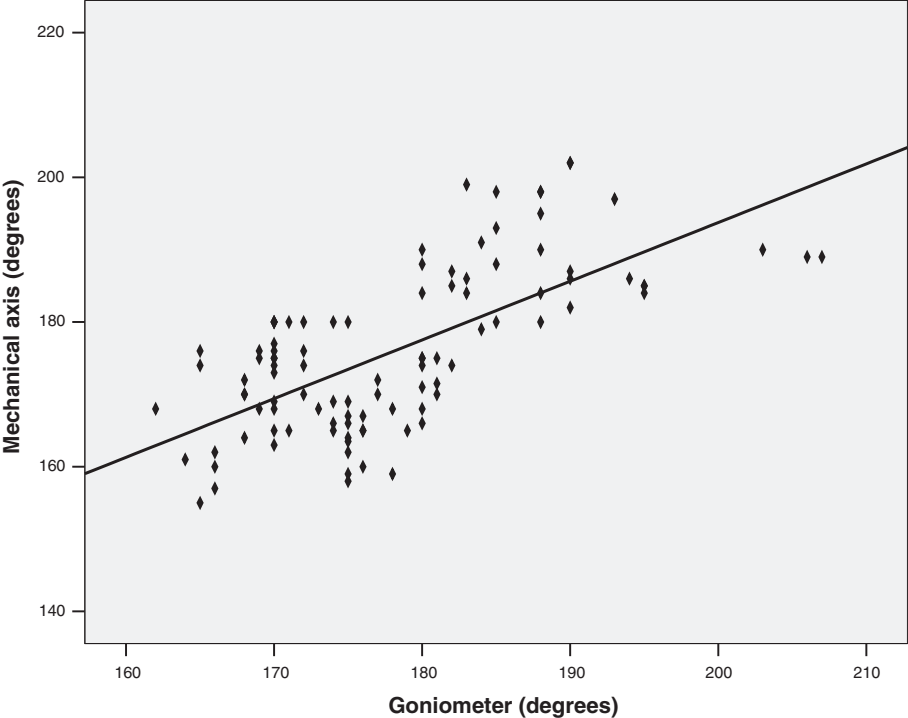

Supplement: MOESM3 [file 9667796]
